# Supplementary material
Source: MDPI journal article supplement (https://www.mdpi.com/2077-1312/11/12/2341)
Supplement: s1 [file s1]

**Table S1 Rock-Eval pyrolysis, TOC data and derived parameters for the source rocks in the Lishui Sag, HI =S<sub>2</sub>\*100/TOC. (Yueguifeng Formation:E<sub>1</sub>y; Lower Lingfeng Formation:E<sub>1</sub>l<sup>2</sup>; Upper Lingfeng E<sub>1</sub>l<sup>1</sup>)**

| Well | Stratum          | Depth (m) | TOC (%) | Tmax (°C) | S <sub>1</sub> +S <sub>2</sub> (mg/g) | HI(mg/g) | Well | Stratum                       | Depth(m)  | TOC (%) | Tmax(°C) | S <sub>1</sub> +S <sub>2</sub> (mg/g) | HI(mg/g) |
|------|------------------|-----------|---------|-----------|---------------------------------------|----------|------|-------------------------------|-----------|---------|----------|---------------------------------------|----------|
| W1   | E <sub>1</sub> y | 3296-3298 | 0.47    | 449.00    | 1.12                                  | 184.15   | E1   | E <sub>1</sub> l <sup>2</sup> | 3501-3504 | 0.75    | 350.00   | 1.45                                  | 118.67   |
| W1   | E <sub>1</sub> y | 3362-3364 | 0.99    | 448.80    | 1.55                                  | 129.15   | E1   | E <sub>1</sub> l <sup>2</sup> | 3489      | 0.87    | 444.00   | 0.79                                  | 55.00    |
| W1   | E <sub>1</sub> y | 3264      | 1.65    | 453.00    | 2.66                                  | 130.00   | E1   | E <sub>1</sub> l <sup>2</sup> | 3520.5    | 0.76    | 431.00   | 0.60                                  | 53.00    |
| W1   | E <sub>1</sub> y | 3290      | 1.28    | 456.00    | 1.70                                  | 115.00   | E1   | E <sub>1</sub> l <sup>2</sup> | 3526.5    | 0.91    | 433.00   | 0.60                                  | 48.00    |
| W1   | E <sub>1</sub> y | 3320      | 1.21    | 446.00    | 2.53                                  | 156.00   | E1   | E <sub>1</sub> l <sup>2</sup> | 3536      | 0.76    | 437.00   | 0.80                                  | 74.00    |
| W1   | E <sub>1</sub> y | 3340      | 1.34    | 451.00    | 2.18                                  | 126.00   | E1   | E <sub>1</sub> l <sup>2</sup> | 3541.5    | 0.68    | 445.00   | 0.62                                  | 59.00    |
| W1   | E <sub>1</sub> y | 3360      | 1.67    | 451.00    | 2.44                                  | 123.00   | E1   | E <sub>1</sub> l <sup>2</sup> | 3595.5    | 1.71    | 461.00   | 1.34                                  | 57.00    |
| W1   | E <sub>1</sub> y | 3380      | 0.99    | 456.00    | 1.38                                  | 120.00   | E1   | E <sub>1</sub> l <sup>2</sup> | 3604.5    | 1.86    | 458.00   | 1.37                                  | 62.00    |
| W1   | E <sub>1</sub> y | 3395      | 0.83    | 434.00    | 1.11                                  | 92.00    | E1   | E <sub>1</sub> l <sup>2</sup> | 3607.5    | 1.87    | 459.00   | 1.62                                  | 66.00    |
| W1   | E <sub>1</sub> y | 3400      | 1.24    | 459.00    | 1.58                                  | 106.00   | E1   | E <sub>1</sub> l <sup>2</sup> | 3640.8    | 1.29    | 466.00   | 0.96                                  | 64.00    |
| W1   | E <sub>1</sub> y | 3435      | 0.86    | 436.00    | 1.09                                  | 93.00    | E1   | E <sub>1</sub> l <sup>2</sup> | 3642.7    | 2.17    | 466.00   | 1.19                                  | 50.00    |
| W1   | E <sub>1</sub> y | 3440      | 1.32    | 457.00    | 1.69                                  | 102.00   | E1   | E <sub>1</sub> l <sup>2</sup> | 3645.8    | 1.14    | 481.00   | 0.58                                  | 43.00    |
| W1   | E <sub>1</sub> y | 3460      | 1.22    | 464.00    | 1.23                                  | 92.00    | E1   | E <sub>1</sub> l <sup>2</sup> | 3646      | 1.11    | 469.00   | 0.72                                  | 56.00    |
| W1   | E <sub>1</sub> y | 3480      | 1.36    | 463.00    | 1.33                                  | 89.00    | E1   | E <sub>1</sub> l <sup>2</sup> | 3646.4    | 1.11    | 481.00   | 0.58                                  | 46.00    |
| W1   | E <sub>1</sub> y | 3500      | 1.54    | 458.00    | 1.74                                  | 100.00   | E1   | E <sub>1</sub> l <sup>2</sup> | 3647.5    | 1.23    | 463.00   | 0.85                                  | 60.00    |
| W1   | E <sub>1</sub> y | 3394-3396 | 0.83    | 434.00    | 1.11                                  | 91.90    | E1   | E <sub>1</sub> l <sup>2</sup> | 3647.81   | 1.57    | 465.00   | 0.83                                  | 43.00    |
| W1   | E <sub>1</sub> y | 3434-3436 | 0.86    | 436.00    | 1.09                                  | 93.35    | E1   | E <sub>1</sub> l <sup>2</sup> | 3688.5    | 1.84    | 448.00   | 1.83                                  | 84.00    |
| W2   | E <sub>1</sub> y | 3758.53   | 3.29    | 432.00    | 1.37                                  | 40.12    | E1   | E <sub>1</sub> l <sup>2</sup> | 3712.5    | 1.16    | 515.00   | 0.92                                  | 66.00    |
| W2   | E <sub>1</sub> y | 3660      | 2.71    | 457.00    | 3.71                                  | 111.00   | E1   | E <sub>1</sub> l <sup>2</sup> | 3739.5    | 1.91    | 455.00   | 2.35                                  | 77.00    |
| W2   | E <sub>1</sub> y | 3680      | 2.38    | 451.00    | 3.60                                  | 116.00   | E1   | E <sub>1</sub> l <sup>2</sup> | 3751.5    | 2.26    | 457.00   | 3.14                                  | 83.00    |
| W2   | E <sub>1</sub> y | 3701      | 0.55    | 438.00    | 1.00                                  | 159.00   | E1   | E <sub>1</sub> l <sup>2</sup> | 3772.5    | 2.49    | 454.00   | 3.43                                  | 98.00    |

| Well | Stratum                      | Depth (m) | TOC (%) | Tmax (°C) | S <sub>1</sub> +S <sub>2</sub> (mg/g) | HI(mg/g) | Well | Stratum                      | Depth(m)  | TOC (%) | Tmax(°C) | S <sub>1</sub> +S <sub>2</sub> (mg/g) | HI(mg/g) |
|------|------------------------------|-----------|---------|-----------|---------------------------------------|----------|------|------------------------------|-----------|---------|----------|---------------------------------------|----------|
| W2   | E <sub>1y</sub>              | 3711      | 0.94    | 424.00    | 1.73                                  | 153.00   | E1   | E <sub>1l</sub> <sup>2</sup> | 3859.5    | 4.01    | 460.00   | 5.76                                  | 93.00    |
| W2   | E <sub>1y</sub>              | 3710      | 1.05    | 464.00    | 0.59                                  | 49.00    | E1   | E <sub>1l</sub> <sup>2</sup> | 3796.5    | 2.55    | 458.00   | 3.61                                  | 94.00    |
| W2   | E <sub>1y</sub>              | 3720      | 1.58    | 434.00    | 2.38                                  | 134.00   | E1   | E <sub>1l</sub> <sup>2</sup> | 3871.5    | 4.08    | 463.00   | 4.67                                  | 77.00    |
| W2   | E <sub>1y</sub>              | 3737      | 1.90    | 436.00    | 2.67                                  | 118.00   | E1   | E <sub>1l</sub> <sup>2</sup> | 3888      | 2.89    | 456.00   | 3.67                                  | 74.00    |
| W2   | E <sub>1y</sub>              | 3748.2    | 1.37    | 482.00    | 0.60                                  | 41.00    | E1   | E <sub>1l</sub> <sup>2</sup> | 3910.5    | 1.48    | 470.00   | 0.82                                  | 45.00    |
| W2   | E <sub>1y</sub>              | 3755.4    | 2.22    | 467.00    | 1.08                                  | 46.00    | E2   | E <sub>1l</sub> <sup>2</sup> | 3462-3465 | 0.77    | 391.00   | 2.00                                  | 180.75   |
| W2   | E <sub>1y</sub>              | 3756.7    | 1.35    | 476.00    | 0.47                                  | 33.00    | E2   | E <sub>1l</sub> <sup>2</sup> | 3720      | 1.09    | 456.00   | 0.79                                  | 33.03    |
| W2   | E <sub>1y</sub>              | 3758      | 2.10    | 468.00    | 0.91                                  | 41.00    | E2   | E <sub>1l</sub> <sup>2</sup> | 3800      | 1.20    | 460.00   | 0.66                                  | 26.67    |
| W2   | E <sub>1y</sub>              | 3759.7    | 2.28    | 469.00    | 1.26                                  | 52.00    | E2   | E <sub>1l</sub> <sup>2</sup> | 3820      | 1.04    | 460.00   | 0.59                                  | 28.85    |
| W2   | E <sub>1y</sub>              | 3759.8    | 2.34    | 471.00    | 1.04                                  | 41.00    | E2   | E <sub>1l</sub> <sup>2</sup> | 3840      | 1.09    | 458.00   | 0.25                                  | 8.26     |
| W2   | E <sub>1y</sub>              | 3760      | 1.97    | 472.00    | 1.77                                  | 71.00    | E2   | E <sub>1l</sub> <sup>2</sup> | 3860      | 1.97    | 455.00   | 0.21                                  | 3.05     |
| E1   | E <sub>1y</sub>              | 3640.80   | 1.29    | 466.00    | 0.96                                  | 64.00    | E2   | E <sub>1l</sub> <sup>2</sup> | 3525-3528 | 0.92    | 352.00   | 1.85                                  | 138.65   |
| E1   | E <sub>1y</sub>              | 3642.70   | 2.17    | 466.00    | 0.96                                  | 64.00    | E2   | E <sub>1l</sub> <sup>2</sup> | 3549-3552 | 0.88    | 351.00   | 1.82                                  | 130.09   |
| E1   | E <sub>1y</sub>              | 3644.35   | 0.79    | 473.00    | 0.27                                  | 32.00    | E2   | E <sub>1l</sub> <sup>2</sup> | 3594-3597 | 0.92    | 352.00   | 2.08                                  | 153.76   |
| E1   | E <sub>1y</sub>              | 3645.80   | 1.14    | 481.00    | 0.58                                  | 43.00    | E2   | E <sub>1l</sub> <sup>2</sup> | 3654-3657 | 1.18    | 426.00   | 3.02                                  | 162.71   |
| E1   | E <sub>1y</sub>              | 3646.40   | 1.11    | 481.00    | 0.58                                  | 46.00    | W1   | E <sub>1l</sub> <sup>1</sup> | 2955-2960 | 0.81    | 445.00   | 2.12                                  | 235.23   |
| E1   | E <sub>1y</sub>              | 3647.40   | 1.49    | 468.00    | 0.72                                  | 40.00    | W1   | E <sub>1l</sub> <sup>1</sup> | 3064-3066 | 0.73    | 431.00   | 0.93                                  | 107.44   |
| E1   | E <sub>1y</sub>              | 3648.16   | 1.57    | 465.00    | 0.83                                  | 43.00    | W2   | E <sub>1l</sub> <sup>1</sup> | 2600      | 1.20    | 429.00   | 1.77                                  | 133.00   |
| E2   | E <sub>1y</sub>              | 3906-3909 | 0.47    | 349.00    | 0.96                                  | 124.20   | W2   | E <sub>1l</sub> <sup>1</sup> | 2726-2728 | 0.60    | 429.00   | 0.96                                  | 137.42   |
| E2   | E <sub>1y</sub>              | 3966-3969 | 0.26    | 343.00    | 0.76                                  | 148.44   | W2   | E <sub>1l</sub> <sup>1</sup> | 2778-2780 | 0.53    | 427.00   | 0.66                                  | 115.75   |
| W1   | E <sub>1l</sub> <sup>2</sup> | 3142-3144 | 0.72    | 432.00    | 1.20                                  | 135.10   | W2   | E <sub>1l</sub> <sup>1</sup> | 2680      | 1.06    | 436.00   | 1.18                                  | 99.00    |
| W1   | E <sub>1l</sub> <sup>2</sup> | 3176-3178 | 0.48    | 433.00    | 1.03                                  | 177.08   | W2   | E <sub>1l</sub> <sup>1</sup> | 2740      | 1.22    | 441.00   | 1.24                                  | 89.00    |
| W1   | E <sub>1l</sub> <sup>2</sup> | 3214-3216 | 1.01    | 449.20    | 1.95                                  | 157.82   | W2   | E <sub>1l</sub> <sup>1</sup> | 2760      | 1.12    | 443.00   | 1.26                                  | 98.00    |

| Well | Stratum                       | Depth (m) | TOC (%) | Tmax (°C) | S <sub>1</sub> +S <sub>2</sub> (mg/g) | HI(mg/g) | Well | Stratum                       | Depth(m)  | TOC (%) | Tmax(°C) | S <sub>1</sub> +S <sub>2</sub> (mg/g) | HI(mg/g) |
|------|-------------------------------|-----------|---------|-----------|---------------------------------------|----------|------|-------------------------------|-----------|---------|----------|---------------------------------------|----------|
| W1   | E <sub>1</sub> I <sup>2</sup> | 3582-3600 | 0.78    | 392.00    | 1.39                                  | 138.28   | W2   | E <sub>1</sub> I <sup>1</sup> | 2900      | 1.36    | 438.00   | 1.55                                  | 101.00   |
| W1   | E <sub>1</sub> I <sup>2</sup> | 3220      | 1.57    | 451.00    | 2.25                                  | 116.00   | W2   | E <sub>1</sub> I <sup>1</sup> | 2880      | 1.21    | 441.00   | 1.33                                  | 99.00    |
| W2   | E <sub>1</sub> I <sup>2</sup> | 3349.28   | 1.18    | 454.00    | 0.78                                  | 60.17    | W2   | E <sub>1</sub> I <sup>1</sup> | 2920      | 1.16    | 442.00   | 1.45                                  | 109.00   |
| W2   | E <sub>1</sub> I <sup>2</sup> | 3100      | 1.37    | 438.00    | 2.30                                  | 145.00   | W2   | E <sub>1</sub> I <sup>1</sup> | 2940      | 1.16    | 441.00   | 1.32                                  | 101.00   |
| W2   | E <sub>1</sub> I <sup>2</sup> | 3180      | 1.46    | 440.00    | 2.72                                  | 153.00   | E1   | E <sub>1</sub> I <sup>1</sup> | 3186-3189 | 1.14    | 437.00   | 1.47                                  | 115.79   |
| W2   | E <sub>1</sub> I <sup>2</sup> | 3200      | 1.34    | 438.00    | 2.17                                  | 140.00   | E1   | E <sub>1</sub> I <sup>1</sup> | 3300-3303 | 0.52    | 434.00   | 0.38                                  | 47.98    |
| W2   | E <sub>1</sub> I <sup>2</sup> | 3220      | 1.16    | 444.00    | 1.37                                  | 101.00   | E1   | E <sub>1</sub> I <sup>1</sup> | 3258-3261 | 5.70    | 437.00   | 9.98                                  | 165.09   |
| W2   | E <sub>1</sub> I <sup>2</sup> | 3260      | 1.45    | 450.00    | 1.94                                  | 117.00   | E1   | E <sub>1</sub> I <sup>1</sup> | 3216-3219 | 0.54    | 436.00   | 0.36                                  | 44.53    |
| W2   | E <sub>1</sub> I <sup>2</sup> | 3300      | 1.41    | 436.00    | 3.07                                  | 188.00   | E1   | E <sub>1</sub> I <sup>1</sup> | 3016      | 0.71    | 436.00   | 0.77                                  | 96.00    |
| W2   | E <sub>1</sub> I <sup>2</sup> | 3339.6    | 1.29    | 458.00    | 1.19                                  | 81.00    | E1   | E <sub>1</sub> I <sup>1</sup> | 3048      | 1.05    | 443.00   | 1.03                                  | 91.00    |
| W2   | E <sub>1</sub> I <sup>2</sup> | 3349.4    | 0.86    | 458.00    | 0.68                                  | 70.00    | E1   | E <sub>1</sub> I <sup>1</sup> | 3067.5    | 0.93    | 435.00   | 0.72                                  | 69.00    |
| W2   | E <sub>1</sub> I <sup>2</sup> | 3349.8    | 1.76    | 457.00    | 1.15                                  | 48.00    | E1   | E <sub>1</sub> I <sup>1</sup> | 3075      | 0.79    | 442.00   | 1.14                                  | 95.00    |
| W2   | E <sub>1</sub> I <sup>2</sup> | 3360      | 1.36    | 449.00    | 1.63                                  | 102.00   | W2   | E <sub>1</sub> I <sup>1</sup> | 3094.5    | 0.58    | 440.00   | 0.86                                  | 121.00   |
| W2   | E <sub>1</sub> I <sup>2</sup> | 3380      | 1.28    | 447.00    | 1.75                                  | 119.00   | E1   | E <sub>1</sub> I <sup>1</sup> | 3121.5    | 0.54    | 437.00   | 0.55                                  | 81.00    |
| W2   | E <sub>1</sub> I <sup>2</sup> | 3388      | 0.84    | 444.00    | 1.41                                  | 141.00   | E1   | E <sub>1</sub> I <sup>1</sup> | 3136      | 0.63    | 438.00   | 0.81                                  | 102.00   |
| W2   | E <sub>1</sub> I <sup>2</sup> | 3400      | 1.40    | 448.00    | 1.89                                  | 119.00   | E1   | E <sub>1</sub> I <sup>1</sup> | 3181.5    | 0.65    | 439.00   | 0.76                                  | 66.00    |
| W2   | E <sub>1</sub> I <sup>2</sup> | 3411      | 0.88    | 453.00    | 0.70                                  | 65.00    | E1   | E <sub>1</sub> I <sup>1</sup> | 3196.5    | 0.76    | 436.00   | 0.47                                  | 50.00    |
| W2   | E <sub>1</sub> I <sup>2</sup> | 3540      | 1.76    | 442.00    | 2.33                                  | 117.00   | E1   | E <sub>1</sub> I <sup>1</sup> | 3215      | 0.67    | 438.00   | 0.84                                  | 104.00   |
| W2   | E <sub>1</sub> I <sup>2</sup> | 3547      | 0.55    | 466.00    | 0.24                                  | 36.00    | E1   | E <sub>1</sub> I <sup>1</sup> | 3288      | 0.55    | 438.00   | 0.72                                  | 58.00    |
| W2   | E <sub>1</sub> I <sup>2</sup> | 3560      | 2.61    | 445.00    | 2.98                                  | 98.00    | E1   | E <sub>1</sub> I <sup>1</sup> | 3313.5    | 0.50    | 435.00   | 0.63                                  | 94.00    |
| W2   | E <sub>1</sub> I <sup>2</sup> | 3600      | 1.38    | 446.00    | 1.78                                  | 108.00   | E1   | E <sub>1</sub> I <sup>1</sup> | 3396-3399 | 0.91    | 432.00   | 0.93                                  | 76.59    |
| W2   | E <sub>1</sub> I <sup>2</sup> | 3620      | 1.27    | 442.00    | 1.84                                  | 127.00   | E2   | E <sub>1</sub> I <sup>1</sup> | 3120      | 0.95    | 434.00   | 0.67                                  | 49.47    |
| W2   | E <sub>1</sub> I <sup>2</sup> | 3640      | 1.59    | 424.00    | 1.19                                  | 58.00    | E2   | E <sub>1</sub> I <sup>1</sup> | 3200      | 0.80    | 436.00   | 0.52                                  | 42.50    |

| Well | Stratum                       | Depth (m) | TOC (%) | Tmax (°C) | S <sub>1</sub> +S <sub>2</sub> (mg/g) | HI(mg/g) | Well | Stratum                       | Depth(m)  | TOC (%) | Tmax(°C) | S <sub>1</sub> +S <sub>2</sub> (mg/g) | HI(mg/g) |
|------|-------------------------------|-----------|---------|-----------|---------------------------------------|----------|------|-------------------------------|-----------|---------|----------|---------------------------------------|----------|
| E1   | E <sub>1</sub> I <sup>2</sup> | 3376.5    | 0.76    | 439.00    | 0.90                                  | 76.00    | E2   | E <sub>1</sub> I <sup>1</sup> | 3165-3168 | 0.75    | 352.00   | 1.11                                  | 110.07   |
| E1   | E <sub>1</sub> I <sup>2</sup> | 3363      | 0.92    | 435.00    | 0.68                                  | 57.00    | E2   | E <sub>1</sub> I <sup>1</sup> | 3440      | 0.77    | 441.00   | 1.19                                  | 83.12    |
| E1   | E <sub>1</sub> I <sup>2</sup> | 3442.5    | 1.09    | 437.00    | 1.43                                  | 103.00   | E2   | E <sub>1</sub> I <sup>1</sup> | 3198-3201 | 0.78    | 346.00   | 1.29                                  | 105.81   |
| E1   | E <sub>1</sub> I <sup>2</sup> | 3463.5    | 1.11    | 436.00    | 0.81                                  | 59.00    | E2   | E <sub>1</sub> I <sup>1</sup> | 3216-3219 | 0.72    | 349.00   | 2.50                                  | 240.28   |
| E1   | E <sub>1</sub> I <sup>2</sup> | 3480      | 1.14    | 436.00    | 0.71                                  | 54.00    |      |                               |           |         |          |                                       |          |

**Table S2 The paleoenvironmental element indexes of the Lishui Sag (Yueguifeng Formation:E<sub>1</sub>y; Lower Lingfeng Formation:E<sub>1</sub>l<sup>2</sup>; Upper Lingfeng E<sub>1</sub>l<sup>1</sup>)**

| Well | Stratum                       | Depth (m) | Sr/Ba | B/Ga | V/(V+Ni) | CI   | Sr/Cu | Fe/Mn  | Mo <sub>EEF</sub> /U <sub>EF</sub> |
|------|-------------------------------|-----------|-------|------|----------|------|-------|--------|------------------------------------|
| W1   | E <sub>1</sub> y              | 3434-3436 | 0.03  | 2.76 | 0.72     | 0.46 | 12.67 | 95.49  | 1.66                               |
| W1   | E <sub>1</sub> y              | 3394-3396 | 0.06  | 2.82 | 0.71     | 0.46 | 19.62 | 78.32  | 2.07                               |
| W1   | E <sub>1</sub> y              | 3362-3364 | 0.09  | 2.77 | 0.72     | 0.44 | 20.73 | 86.34  | 2.37                               |
| W1   | E <sub>1</sub> y              | 3296-3298 | 0.10  | 2.69 | 0.72     | 0.49 | 19.35 | 93.69  | 2.21                               |
| W2   | E <sub>1</sub> y              | 3746.35   | 0.30  | \    | 0.89     | 0.33 | 7.76  | 247.17 | 1.04                               |
| W2   | E <sub>1</sub> y              | 3747.04   | 0.25  | \    | 0.71     | 0.47 | 6.53  | 190.47 | 1.07                               |
| W2   | E <sub>1</sub> y              | 3747.69   | 0.26  | \    | 0.84     | 0.45 | 7.92  | 193.58 | 1.50                               |
| W2   | E <sub>1</sub> y              | 3754.34   | 0.25  | \    | 0.85     | 0.62 | 8.11  | 192.50 | 1.43                               |
| W2   | E <sub>1</sub> y              | 3757.28   | 0.29  | \    | 0.86     | 0.39 | 8.12  | 195.58 | 1.21                               |
| W2   | E <sub>1</sub> y              | 3759.52   | 0.31  | \    | 0.80     | 0.70 | 4.52  | 119.76 | 1.09                               |
| W2   | E <sub>1</sub> y              | 3760.50   | 0.28  | \    | 0.84     | 0.61 | 6.46  | 134.59 | 1.17                               |
| W2   | E <sub>1</sub> y              | 3763.48   | 0.27  | \    | 0.87     | 0.44 | 10.16 | 200.81 | 1.25                               |
| E1   | E <sub>1</sub> y              | 3640.80   | 0.54  | \    | 0.96     | 0.38 | 3.90  | 109.89 | 1.37                               |
| E1   | E <sub>1</sub> y              | 3642.70   | 0.58  | \    | 0.89     | 0.53 | 4.91  | 116.29 | 1.13                               |
| E1   | E <sub>1</sub> y              | 3644.35   | 0.52  | \    | 0.95     | 0.42 | 5.05  | 110.15 | 1.03                               |
| E1   | E <sub>1</sub> y              | 3645.80   | 0.73  | \    | 0.86     | 0.86 | 7.33  | 100.90 | 1.81                               |
| E1   | E <sub>1</sub> y              | 3646.40   | 0.76  | \    | 0.86     | 0.89 | 7.57  | 95.62  | 1.98                               |
| E1   | E <sub>1</sub> y              | 3647.40   | 0.58  | \    | 0.87     | 0.77 | 6.14  | 108.29 | 1.01                               |
| E1   | E <sub>1</sub> y              | 3648.16   | 0.61  | \    | 0.89     | 0.73 | 6.48  | 105.79 | 1.42                               |
| E2   | E <sub>1</sub> y              | 3966-3969 | 0.16  | 1.17 | 0.81     | 0.41 | 18.11 | 25.19  | 1.61                               |
| W1   | E <sub>1</sub> l <sup>2</sup> | 3214-3216 | 0.10  | 2.98 | 0.71     | 0.36 | 16.83 | 67.30  | 2.85                               |
| W1   | E <sub>1</sub> l <sup>2</sup> | 3142-3144 | 0.10  | 2.70 | 0.65     | 0.32 | 14.04 | 39.84  | 2.46                               |
| W2   | E <sub>1</sub> l <sup>2</sup> | 3332.02   | 0.34  | \    | 0.90     | 0.53 | 7.59  | 182.98 | 2.08                               |
| W2   | E <sub>1</sub> l <sup>2</sup> | 3334      | 0.34  | \    | 0.91     | 0.53 | 7.53  | 165.11 | 2.04                               |
| W2   | E <sub>1</sub> l <sup>2</sup> | 3335.90   | 0.29  | \    | 0.84     | 0.46 | 13.77 | 145.35 | 1.71                               |
| W2   | E <sub>1</sub> l <sup>2</sup> | 3336.21   | 0.32  | \    | 0.86     | 0.50 | 9.14  | 144.82 | 1.67                               |
| W2   | E <sub>1</sub> l <sup>2</sup> | 3337.5    | 0.29  | \    | 0.83     | 0.38 | 9.24  | 176.56 | 1.67                               |
| W2   | E <sub>1</sub> l <sup>2</sup> | 3337.625  | 0.34  | \    | 0.86     | 0.41 | 6.71  | 187.98 | 2.06                               |
| W2   | E <sub>1</sub> l <sup>2</sup> | 3338.66   | 0.29  | \    | 0.83     | 0.41 | 10.52 | 179.41 | 2.34                               |
| W2   | E <sub>1</sub> l <sup>2</sup> | 3339.67   | 0.30  | \    | 0.81     | 0.40 | 10.20 | 130.28 | 2.28                               |
| W2   | E <sub>1</sub> l <sup>2</sup> | 3342.00   | 0.32  | \    | 0.88     | 0.34 | 12.42 | 163.99 | 1.82                               |
| W2   | E <sub>1</sub> l <sup>2</sup> | 3348.45   | 0.29  | \    | 0.83     | 0.36 | 10.63 | 119.94 | 2.04                               |
| W2   | E <sub>1</sub> l <sup>2</sup> | 3349.73   | 0.30  | \    | 0.80     | 0.39 | 11.12 | 101.94 | 2.18                               |
| W2   | E <sub>1</sub> l <sup>2</sup> | 3348.40   | 0.32  | \    | 0.82     | 0.37 | 8.93  | 118.67 | 1.77                               |
| E1   | E <sub>1</sub> l <sup>2</sup> | 3535.00   | 0.87  | \    | 0.73     | 0.40 | 13.29 | 89.06  | 3.52                               |
| E1   | E <sub>1</sub> l <sup>2</sup> | 3396-3399 | 1.73  | 3.92 | 0.66     | 0.19 | 37.45 | 60.72  | 3.77                               |
| E1   | E <sub>1</sub> l <sup>2</sup> | 3501-3504 | 0.98  | 4.82 | 0.66     | 0.29 | 13.56 | 37.92  | 1.44                               |
| E2   | E <sub>1</sub> l <sup>2</sup> | 3462-3465 | 0.41  | 4.73 | 0.63     | 0.21 | 28.09 | 72.50  | 4.57                               |
| E2   | E <sub>1</sub> l <sup>2</sup> | 3525-3528 | 1.11  | 4.15 | 0.64     | 0.25 | 25.47 | 75.48  | 4.39                               |
| E2   | E <sub>1</sub> l <sup>2</sup> | 3549-3552 | 0.73  | 3.80 | 0.62     | 0.21 | 6.59  | 64.03  | 4.85                               |

| Well | Stratum                     | Depth (m) | Sr/Ba | B/Ga | V/(V+Ni) | Cl   | Sr/Cu | Fe/Mn | Mo <sub>EF</sub> /U <sub>EF</sub> |
|------|-----------------------------|-----------|-------|------|----------|------|-------|-------|-----------------------------------|
| E2   | E <sub>1</sub> <sup>2</sup> | 3654-3657 | 0.10  | 2.50 | 0.64     | 0.24 | 34.11 | 68.13 | 3.65                              |
| E2   | E <sub>1</sub> <sup>2</sup> | 3594-3597 | 0.57  | 4.19 | 0.66     | 0.21 | 33.59 | 60.21 | 4.48                              |
| E2   | E <sub>1</sub> <sup>2</sup> | 3906-3909 | 0.32  | 2.19 | 0.79     | 0.34 | 22.00 | 51.36 | 1.42                              |
| W1   | E <sub>1</sub> <sup>1</sup> | 2955-2960 | 0.06  | 2.70 | 0.71     | 0.45 | 14.00 | 32.68 | 1.43                              |
| E1   | E <sub>1</sub> <sup>1</sup> | 3186-3189 | 1.70  | 3.83 | 0.67     | 0.23 | 26.93 | 73.98 | 1.87                              |
| E1   | E <sub>1</sub> <sup>1</sup> | 3300-3303 | 2.23  | 3.06 | 0.66     | 0.22 | 37.52 | 70.43 | 3.71                              |
| E1   | E <sub>1</sub> <sup>1</sup> | 3258-3261 | 1.74  | 2.30 | 0.67     | 0.22 | 27.07 | 74.54 | 2.25                              |
| E1   | E <sub>1</sub> <sup>1</sup> | 3216-3219 | 1.64  | 4.51 | 0.67     | 0.21 | 33.67 | 76.41 | 2.65                              |
| E2   | E <sub>1</sub> <sup>1</sup> | 3165-3168 | 0.65  | 4.66 | 0.66     | 0.25 | 15.62 | 40.48 | 1.68                              |
| E2   | E <sub>1</sub> <sup>1</sup> | 3198-3201 | 0.87  | 4.76 | 0.65     | 0.29 | 14.38 | 38.26 | 2.13                              |
| E2   | E <sub>1</sub> <sup>1</sup> | 3216-3219 | 0.35  | 4.92 | 0.68     | 0.26 | 17.41 | 48.50 | 3.00                              |

**Table S3 Biomarker Paramaters of source rocke in the Lishui Sag. (Yueguifeng Formation:E<sub>1</sub>y; Lower Lingfeng Formation:E<sub>1</sub>l<sup>2</sup>; Upper Lingfeng E<sub>1</sub>l<sup>1</sup>)**

| Well | Stratum                       | Depth (m) | CPI  | OEP  | Pr/Ph | Ph/n-C <sub>18</sub> | Pr/n-C <sub>1</sub><br>7 | G./C <sub>30</sub> H | C <sub>29</sub> H/C <sub>30</sub> H | $\frac{\sum nC_{21}}{\sum nC_{22}}$<br>+ |
|------|-------------------------------|-----------|------|------|-------|----------------------|--------------------------|----------------------|-------------------------------------|------------------------------------------|
| A    | E <sub>1</sub> l <sup>1</sup> | 2360-2380 | 1.93 | 2.89 | 1.91  | 0.74                 | 1.14                     | 0.08                 | 0.70                                | 0.72                                     |
| B    | E <sub>1</sub> l <sup>1</sup> | 2706      | 1.77 | 2.07 | 3.15  | 1.80                 | 0.57                     | 0.06                 | 0.56                                | 0.26                                     |
| B    | E <sub>1</sub> l <sup>1</sup> | 2854.5    | 2.21 | 1.05 | 2.08  | 1.06                 | 0.49                     | 0.05                 | 0.55                                | 0.73                                     |
| B    | E <sub>1</sub> l <sup>1</sup> | 2997.5    | 1.23 | 1.15 | 3.42  | 2.36                 | 0.66                     | 0.03                 | 0.55                                | 0.45                                     |
| B    | E <sub>1</sub> l <sup>1</sup> | 3145.5    | 1.19 | 0.97 | 3.11  | 1.58                 | 0.45                     | 0.02                 | 0.73                                | 0.67                                     |
| B    | E <sub>1</sub> l <sup>1</sup> | 3151.5    | 1.25 | 1.14 | 2.97  | 1.62                 | 0.51                     | 0.03                 | 0.70                                | 0.66                                     |
| B    | E <sub>1</sub> l <sup>1</sup> | 3220      | 1.10 | 1.08 | 2.88  | 1.22                 | 0.4                      | 0.03                 | 0.66                                | 0.82                                     |
| B    | E <sub>1</sub> l <sup>1</sup> | 3265      | 1.14 | 1.02 | 2.47  | 1.35                 | 0.49                     | 0.02                 | 0.68                                | 0.79                                     |
| D    | E <sub>1</sub> l <sup>1</sup> | 2440      | 1.12 | 1.05 | 1.42  | 0.75                 | 0.37                     | 0.05                 | 0.72                                | 1.72                                     |
| D    | E <sub>1</sub> l <sup>1</sup> | 2520      | 1.01 | 1.08 | 2.03  | 1.09                 | 0.45                     | 0.04                 | 0.61                                | 0.99                                     |
| D    | E <sub>1</sub> l <sup>1</sup> | 2480      | 1.11 | 1.09 | 2.34  | 1.26                 | 0.53                     | 0.04                 | 0.56                                | 0.97                                     |
| E1   | E <sub>1</sub> l <sup>1</sup> | 3015-3081 | 1.34 | 1.16 | 1.90  | 1.40                 | 0.17                     | 0.04                 | 0.57                                | 1.34                                     |
| A    | E <sub>1</sub> l <sup>2</sup> | 2840-2860 | 1.32 | 3.43 | 1.27  | 1.64                 | 4.13                     | 0.12                 | 0.70                                | 0.68                                     |
| A    | E <sub>1</sub> l <sup>2</sup> | 2940-2950 | 1.57 | 4.31 | 1.21  | 1.51                 | 5.22                     | 0.05                 | 0.63                                | 1.11                                     |
| A    | E <sub>1</sub> l <sup>2</sup> | 3030-3050 | 1.46 | 4.84 | 1.32  | 1.83                 | 6.92                     | 0.10                 | 0.86                                | 0.99                                     |
| E1   | E <sub>1</sub> l <sup>2</sup> | 3453-3507 | 1.14 | 1.06 | 1.46  | 0.79                 | 0.19                     | 0.09                 | 0.71                                | 1.16                                     |
| A    | E <sub>1</sub> y              | 3360-3370 | 1.30 | 2.77 | 1.78  | 3.11                 | 4.13                     | 0.04                 | 0.73                                | 0.58                                     |
| A    | E <sub>1</sub> y              | 3400-3420 | 1.30 | 2.63 | 1.79  | 3.16                 | 5.57                     | 0.08                 | 0.76                                | 0.79                                     |
| E1   | E <sub>1</sub> y              | 3549-3603 | 1.05 | 1.01 | 1.53  | 0.53                 | 0.11                     | 0.11                 | 0.79                                | 0.96                                     |
| E1   | E <sub>1</sub> y              | 3647.5    | 1.28 | 1.03 | 2.79  | 0.26                 | 0.08                     | 0.16                 | 0.83                                | 1.10                                     |
| E1   | E <sub>1</sub> y              | 3723-3726 | 1.08 | 1.05 | 1.74  | 0.37                 | 0.12                     | 0.15                 | 0.83                                | 1.32                                     |
| E1   | E <sub>1</sub> y              | 3771-3855 | 1.11 | 1.03 | 1.69  | 0.23                 | 0.11                     | 0.06                 | 0.83                                | 1.28                                     |
| E1   | E <sub>1</sub> y              | 3646      | 1.20 | 0.37 | 1.83  | 0.79                 | 0.21                     | 0.07                 | 0.53                                | 0.68                                     |
| E1   | E <sub>1</sub> y              | 3909-3912 | 1.10 | 1.04 | 1.12  | 0.17                 | 0.09                     | 0.09                 | 0.57                                | 0.86                                     |
